# Supplementary material for: Dent's disease
Source: Springer Nature journal article supplement (doi:10.1186/1750-1172-5-28), 2010-01-01
Supplement: 13023_2009_191_MOESM1_ESM.pdf [file 13023_2009_191_MOESM1_ESM.pdf]

## Nephron

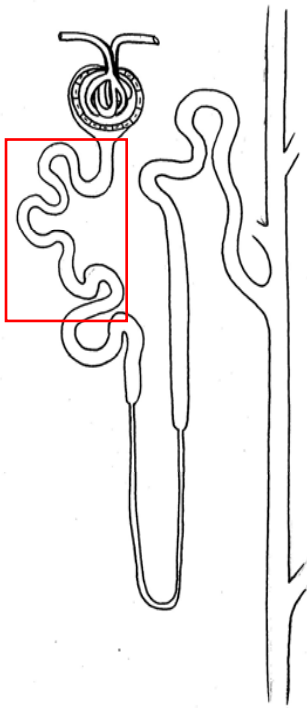

## Proximal tubule cell

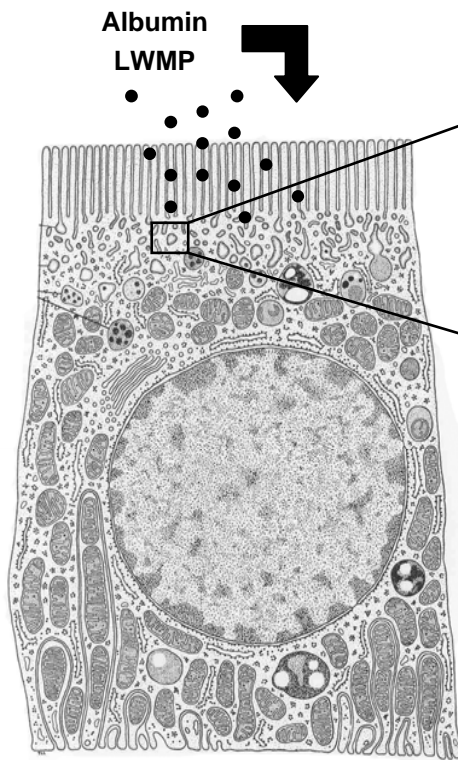

## Apical endosome

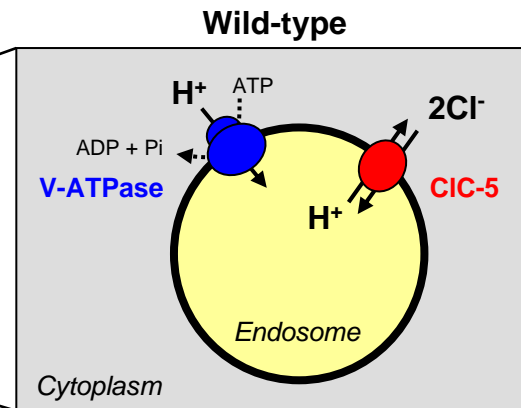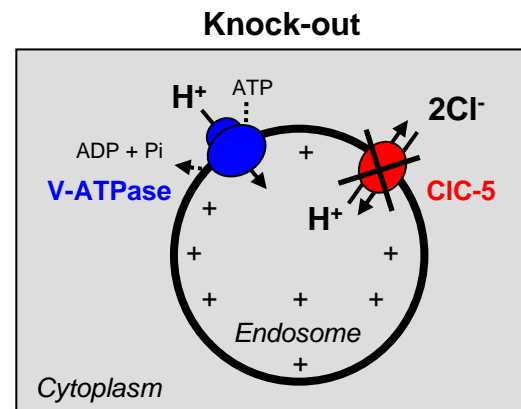

| CIC-5     | Vesicular acidification | Traffic of apical receptors | Endocytosis | Dent's disease phenotype |
|-----------|-------------------------|-----------------------------|-------------|--------------------------|
| Wild-type | Normal                  | Normal                      | Normal      | Absent                   |
| Knock-out | Impaired                | Impaired                    | Impaired    | Present                  |
